# Supplementary material for: Intestinal Microbiota Reduction Followed by Fasting Discloses Microbial Triggering of Inflammation in Rheumatoid Arthritis
Source: MDPI journal article supplement (doi:10.3390/jcm12134359), 2023-06-28

# Figure S1

## Annotation of meta-clusters

Populations were annotated according to the subsequent steps of population selection, corresponding to the strategy of conventional gating. The populations with their corresponding colour are indicated in the upper right corner of each plot.

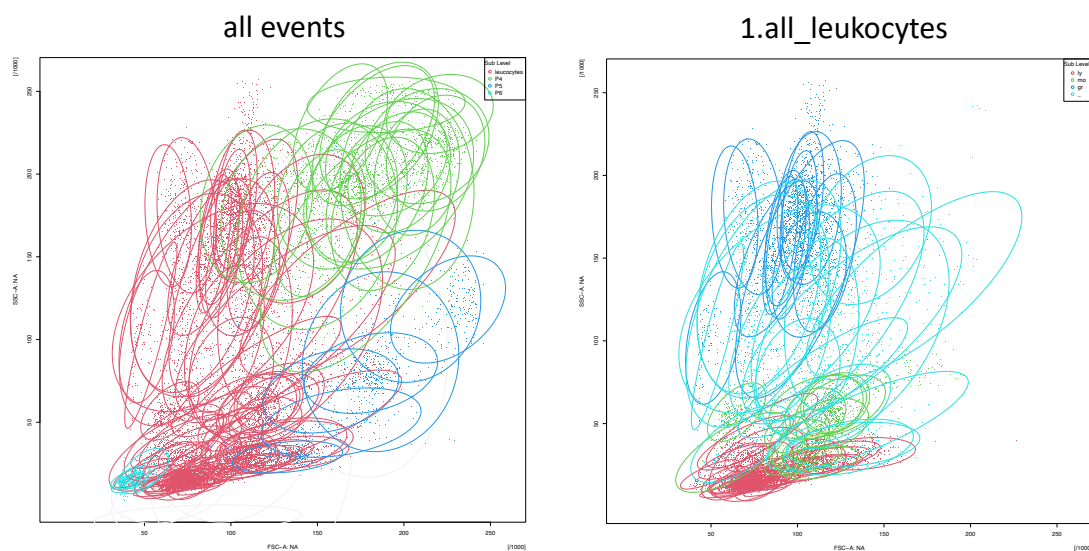

## 1.1.all\_leukocytes\_lymphocytes

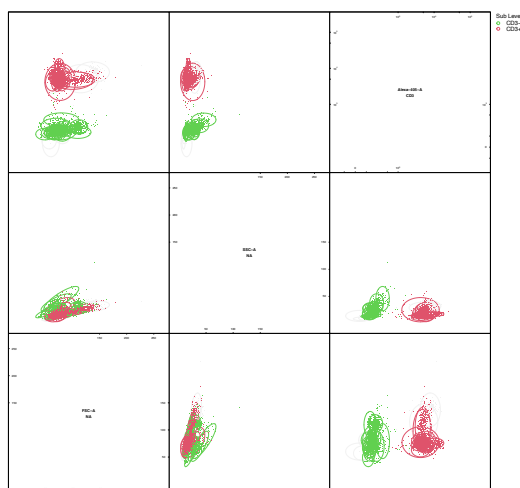

# Lymphocytes CD3 negative

1.1.1.all\_leukocytes\_ly\_CD3<sup>-</sup>

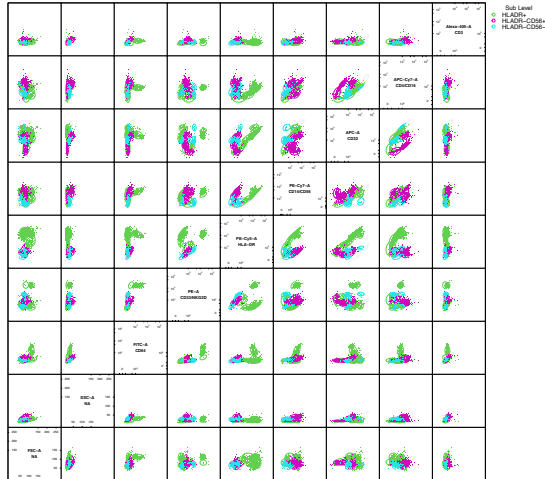

1.1.1.1.all\_leukocytes\_ly\_CD3<sup>-</sup>\_HLADR<sup>+</sup>

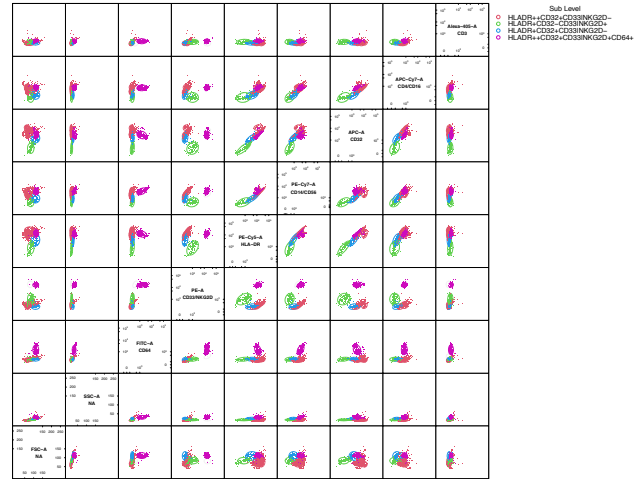

1.1.1.2.all\_leukocytes\_ly\_CD3<sup>-</sup>\_HLADR<sup>+</sup>CD56<sup>+</sup>

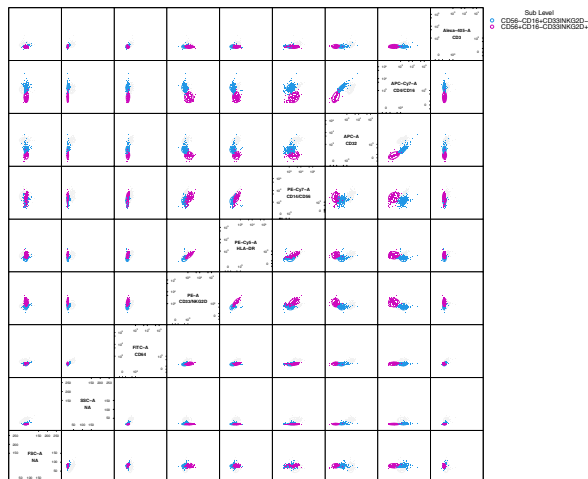

1.1.1.3.all\_leukocytes\_ly\_CD3<sup>-</sup>\_HLADR<sup>+</sup>CD56<sup>+</sup>

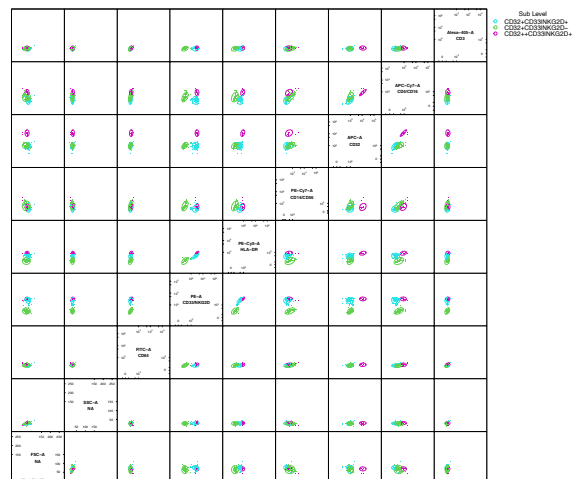

# Lymphocytes CD3 positive

## 1.1.2.all\_leukocytes\_ly\_CD3<sup>+</sup>

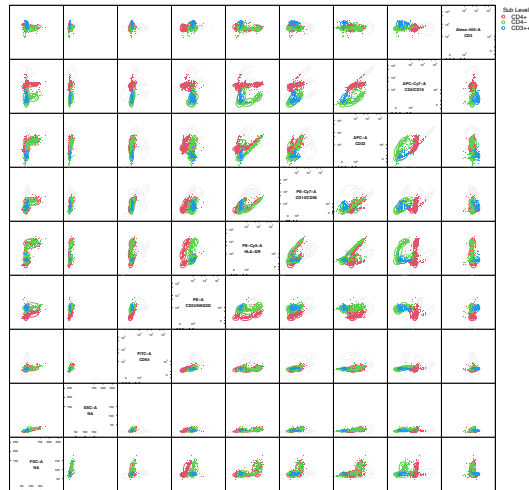

## 1.1.2.1.all\_leukocytes\_ly\_CD3<sup>+</sup>\_CD4<sup>+</sup>

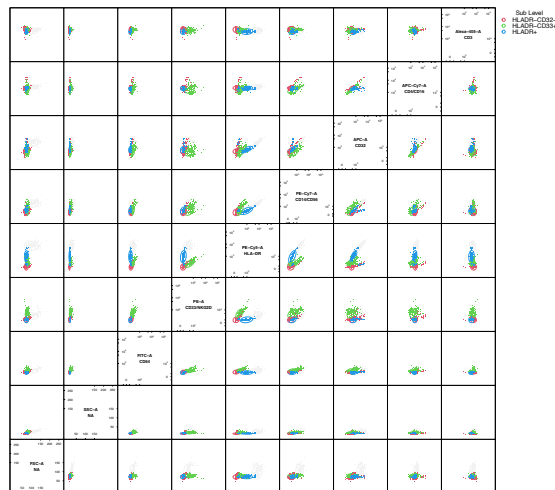

## 1.1.2.1.all\_leukocytes\_ly\_CD3<sup>+</sup>\_CD4<sup>-</sup>

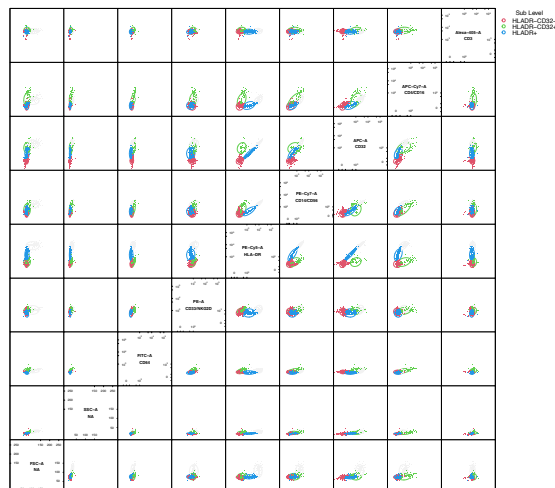

# Monocytes

1.2.all\_leukocytes\_mo

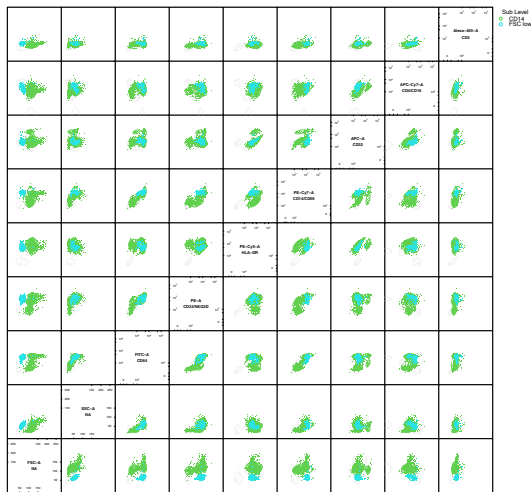

1.2.1.all\_leukocytes\_mo\_CD14

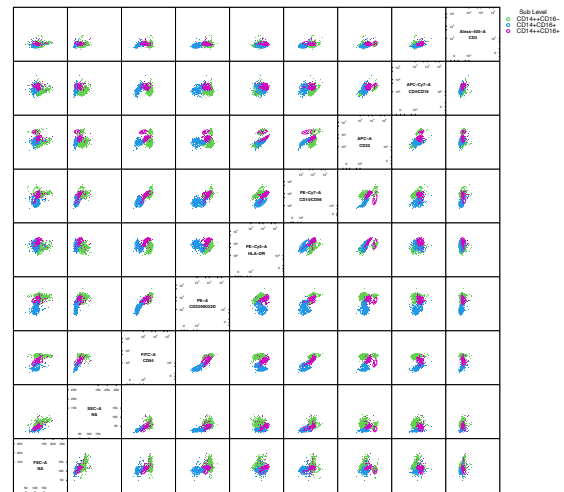

1.2.1.2.all\_leukocytes\_mo\_CD14\_CD14<sup>+</sup>CD16<sup>+</sup>

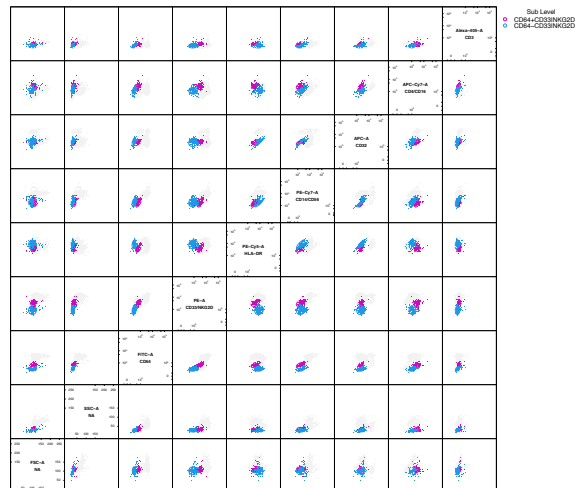

# Granulocytes

1.3.all\_leukocytes\_granulocytes

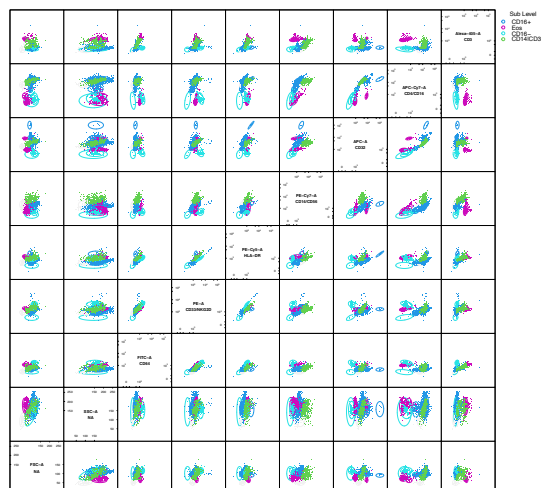

Supplement: s1 [file s1]
