# Supplementary material for: Intestinal Microbiota Reduction Followed by Fasting Discloses Microbial Triggering of Inflammation in Rheumatoid Arthritis
Source: MDPI journal article supplement (doi:10.3390/jcm12134359), 2023-06-28
Supplement: s1 [file s1]

**Figure S3:**

**Non-classical monocytes increase in virtually all RA patients at T1 and T2:**

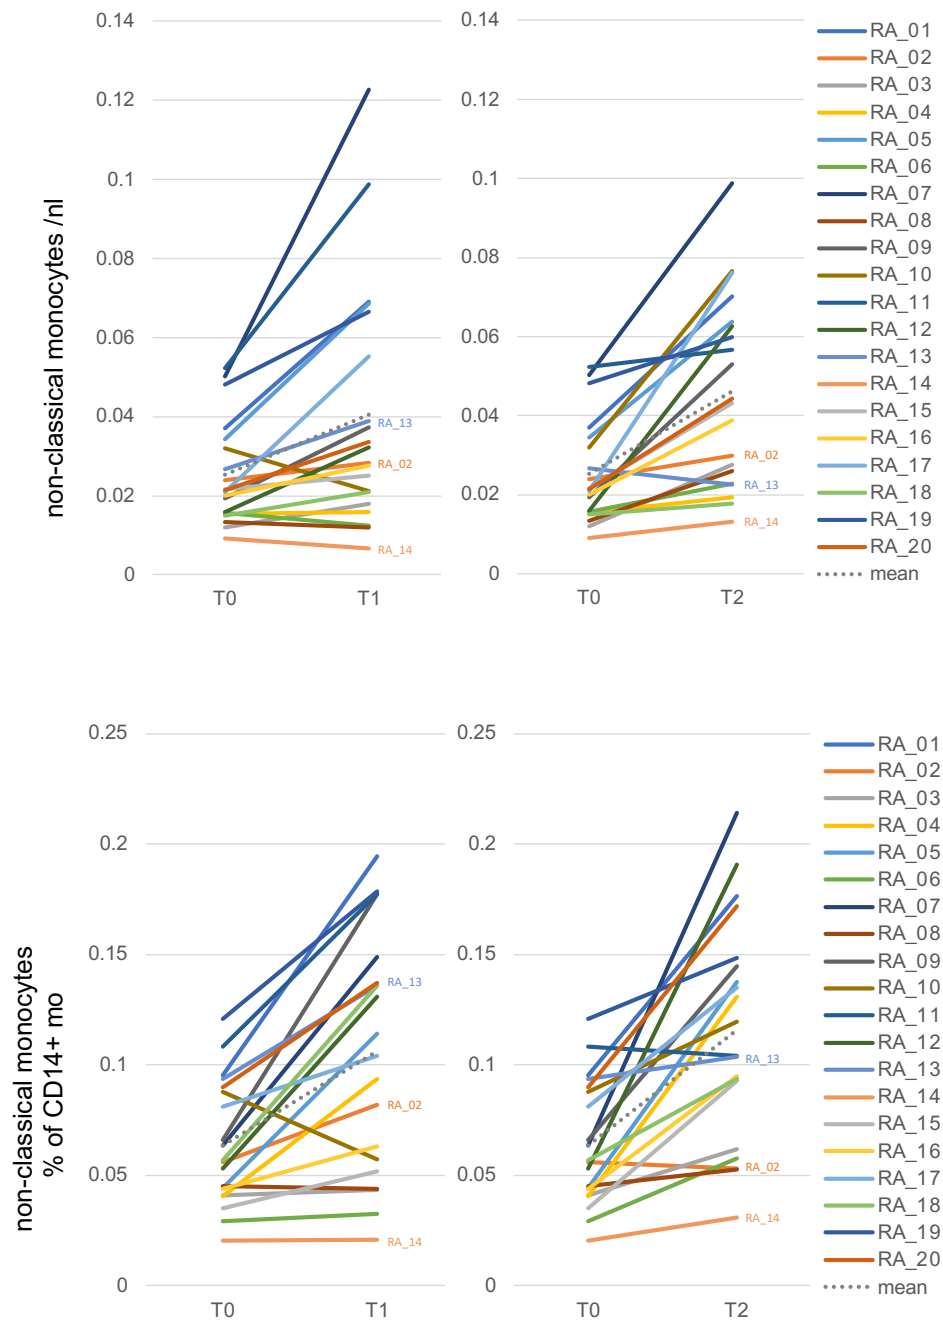

**Legend Figure S3**

Non-classical monocytes were determined by CD14 and CD16 staining. In RA patients, there was an increase in the absolute and relative number of non-classical monocytes, which in average became more dominant over time. Non-responders according to EULAR criteria[32] were labelled separately with RA\_02, RA\_13 and RA\_14.
