# Supplementary material for: Intestinal Microbiota Reduction Followed by Fasting Discloses Microbial Triggering of Inflammation in Rheumatoid Arthritis
Source: MDPI journal article supplement (doi:10.3390/jcm12134359), 2023-06-28
Supplement: s1 [file s1]

## Figure S2

### Improvement of disease activity

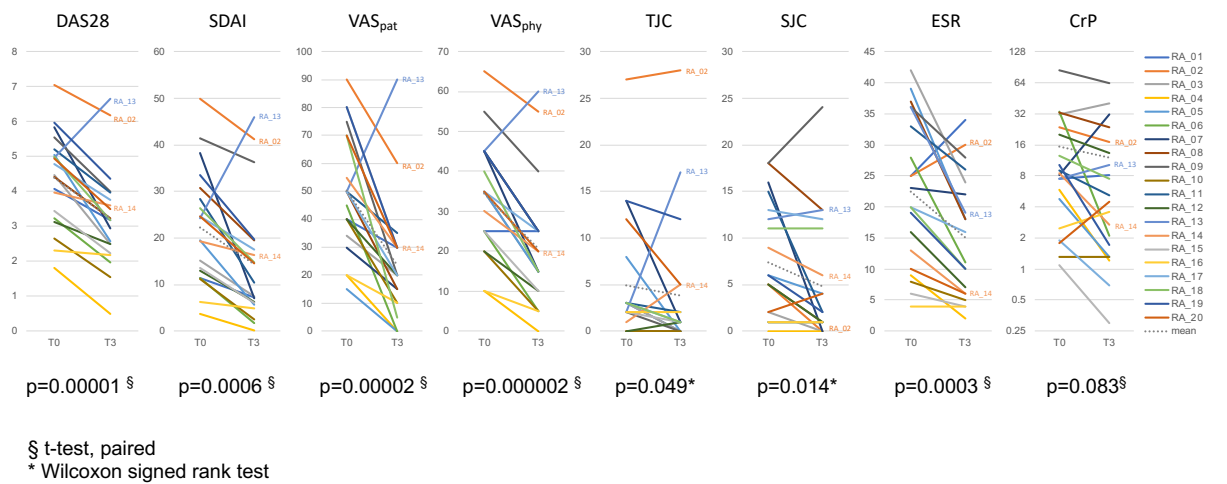

### Legend Figure S2

Improvement of disease activity (DAS28, SDAI) and contributing parameters:

Improvement in each RA patient is displayed between T0 and T3 for the overall disease activity score DAS28, SDAI and the contributing parameters of patient (<sub>pat</sub>) and physician (<sub>phy</sub>) assessment of disease activity (VAS=visual analog scale from 0=no activity to 100=maximum conceivable activity), tender joint count (TJC) and swollen joint count (SJC) from 28 joints indicated in figure 1, erythrocyte sedimentation rate (ESR) and C-reactive protein (CrP). Significance of change is indicated by p-values (§=paired t-test; \*=Wilcoxon signed-rank test) and non-responders according to EULAR criteria[32] were labelled separately with RA\_02, RA\_13 and RA\_14.
